# Supplementary material for: A stacking ensemble deep learning approach to cancer type classification based on TCGA data
Source: PubMed Central journal article supplement (PMC8329290; doi:10.1038/s41598-021-95128-x), 2021-08-02
Supplement: 41598_2021_95128_MOESM1_ESM.pdf [file 41598_2021_95128_MOESM1_ESM.pdf]

# **A Stacking Ensemble Deep Learning Approach to Cancer Type Classification Based on TCGA Data**

**Mohanad Mohammed<sup>1\*</sup>, Henry Mwambi<sup>1</sup>, Innocent B. Mboya<sup>1,4</sup>, Murtada K. Elbashir<sup>5,6</sup>, Bernard Omolo<sup>1,2,3</sup>**

<sup>1</sup>School of Mathematics, Statistics and Computer Science, University of KwaZulu-Natal, Pietermaritzburg, Private Bag X01, Scottsville 3209, South Africa.

<sup>2</sup>Division of Mathematics & Computer Science, University of South Carolina-Upstate, 800 University Way, Spartanburg, USA.

<sup>3</sup>School of Public Health, Faculty of Health Sciences, University of Witwatersrand, Johannesburg, South Africa.

<sup>4</sup>Department of Epidemiology and Biostatistics, Kilimanjaro Christian Medical University College (KCMUCo), P. O. Box 2240, Moshi-Tanzania.

<sup>5</sup>College of Computer and Information Sciences, Jouf University, Sakaka 72441, Saudi Arabia.

<sup>6</sup>Faculty of Mathematical and Computer Sciences, University of Gezira, Wad Madani 11123, Sudan.

\* Corresponding Author, mohanadadam32@gmail.com

The 173 significant genes that were returned using LASSO with 10-folds cross-validation.

|                 | <b>baseMean</b> | <b>log2FoldChange</b> | <b>lfcSE</b> | <b>stat</b> | <b>pvalue</b> | <b>padj</b> |
|-----------------|-----------------|-----------------------|--------------|-------------|---------------|-------------|
| <b>ACSL4</b>    | 3370.81         | 0.86896               | 0.0476       | 18.2555     | 1.87E-74      | 5.87E-74    |
| <b>ADAM28</b>   | 528.011         | -0.6334               | 0.07523      | -8.4205     | 3.75E-17      | 5.89E-17    |
| <b>ADAM8</b>    | 1711.32         | -1.6217               | 0.06691      | -24.236     | 9.37E-130     | 4.72E-129   |
| <b>AFF1</b>     | 6892.33         | 1.91525               | 0.03596      | 53.2632     | 0             | 0           |
| <b>ALPK3</b>    | 806.889         | 1.03086               | 0.06688      | 15.4126     | 1.35E-53      | 3.41E-53    |
| <b>ANKS4B</b>   | 185.576         | -4.4648               | 0.3449       | -12.945     | 2.50E-38      | 5.34E-38    |
| <b>ANXA6</b>    | 9806.23         | -0.8436               | 0.04146      | -20.347     | 4.90E-92      | 1.80E-91    |
| <b>AQP3</b>     | 5437.67         | -4.0455               | 0.10407      | -38.875     | 0             | 0           |
| <b>AQP4</b>     | 906.546         | 4.21352               | 0.14895      | 28.2886     | 4.77E-176     | 3.38E-175   |
| <b>ATF1</b>     | 1520.23         | 0.63084               | 0.0224       | 28.1681     | 1.44E-174     | 1.01E-173   |
| <b>ATP2B4</b>   | 11058.4         | -0.1707               | 0.04502      | -3.791      | 0.00015007    | 0.00018147  |
| <b>ATP6V0C</b>  | 11556.3         | -0.2019               | 0.02699      | -7.4806     | 7.40E-14      | 1.10E-13    |
| <b>BDH2</b>     | 2407.05         | 2.14255               | 0.04332      | 49.4594     | 0             | 0           |
| <b>C11orf41</b> | 550.413         | -2.9532               | 0.09899      | -29.835     | 1.39E-195     | 1.13E-194   |
| <b>C18orf45</b> | 1239.63         | -2.9454               | 0.03854      | -76.428     | 0             | 0           |
| <b>C1orf186</b> | 549.158         | -1.0929               | 0.12461      | -8.7706     | 1.78E-18      | 2.86E-18    |
| <b>C1orf190</b> | 113.125         | 3.35189               | 0.06494      | 51.6182     | 0             | 0           |
| <b>C2orf89</b>  | 603.527         | 2.286                 | 0.08833      | 25.8802     | 1.11E-147     | 6.40E-147   |
| <b>C5orf53</b>  | 849.576         | 1.31961               | 0.03811      | 34.6256     | 1.04E-262     | 1.29E-261   |
| <b>C6orf138</b> | 223.422         | 4.66633               | 0.09545      | 48.8861     | 0             | 0           |
| <b>C6orf222</b> | 123.793         | -1.3166               | 0.22378      | -5.8834     | 4.02E-09      | 5.43E-09    |
| <b>C9orf167</b> | 1440.81         | 2.15425               | 0.04608      | 46.753      | 0             | 0           |
| <b>C9orf91</b>  | 1988.46         | -1.8341               | 0.03453      | -53.118     | 0             | 0           |
| <b>CCDC109A</b> | 1907.7          | -0.1384               | 0.03195      | -4.331      | 1.48E-05      | 1.84E-05    |
| <b>CCL13</b>    | 213.252         | 1.6253                | 0.12751      | 12.7464     | 3.27E-37      | 6.87E-37    |
| <b>CCNJL</b>    | 633.306         | 1.36706               | 0.06965      | 19.6283     | 8.87E-86      | 3.08E-85    |
| <b>CDH26</b>    | 72.9319         | -0.8001               | 0.10072      | -7.9431     | 1.97E-15      | 3.00E-15    |
| <b>CDX1</b>     | 673.477         | -1.5722               | 0.0964       | -16.309     | 8.51E-60      | 2.30E-59    |
| <b>CEACAM6</b>  | 28629.9         | -3.6857               | 0.14666      | -25.131     | 2.27E-139     | 1.23E-138   |
| <b>CFL2</b>     | 1388.26         | 1.19518               | 0.0398       | 30.0259     | 4.51E-198     | 3.73E-197   |
| <b>CHRAC1</b>   | 2544.38         | 0.15682               | 0.03415      | 4.59235     | 4.38E-06      | 5.52E-06    |
| <b>CHSY1</b>    | 3327.68         | -1.3737               | 0.0392       | -35.046     | 4.43E-269     | 5.71E-268   |
| <b>CLDN3</b>    | 11251.4         | 1.37722               | 0.06213      | 22.1666     | 7.22E-109     | 3.09E-108   |
| <b>CPNE8</b>    | 456.31          | 0.57156               | 0.05593      | 10.219      | 1.63E-24      | 2.90E-24    |
| <b>CTSB</b>     | 111838          | 3.01424               | 0.04021      | 74.9717     | 0             | 0           |
| <b>CTSK</b>     | 7158.98         | -2.5965               | 0.07718      | -33.639     | 4.45E-248     | 5.05E-247   |
| <b>CTU1</b>     | 275.536         | 0.30631               | 0.04339      | 7.05937     | 1.67E-12      | 2.42E-12    |
| <b>CXCL17</b>   | 3781.26         | -0.7251               | 0.14759      | -4.9128     | 8.98E-07      | 1.15E-06    |
| <b>CYP2C18</b>  | 63.4312         | -4.0536               | 0.26513      | -15.289     | 9.07E-53      | 2.27E-52    |
| <b>DCBLD2</b>   | 4066.26         | 2.03321               | 0.05135      | 39.5971     | 0             | 0           |

|                |         |         |         |         |           |           |
|----------------|---------|---------|---------|---------|-----------|-----------|
| <b>DFNA5</b>   | 605.619 | 1.6637  | 0.0525  | 31.6899 | 2.14E-220 | 2.07E-219 |
| <b>DIRAS1</b>  | 474.766 | -2.5309 | 0.09457 | -26.761 | 9.16E-158 | 5.69E-157 |
| <b>DOCK3</b>   | 714.113 | 4.56055 | 0.09507 | 47.9697 | 0         | 0         |
| <b>DPY19L1</b> | 2490.91 | 0.73826 | 0.04509 | 16.3721 | 3.03E-60  | 8.24E-60  |
| <b>DVL3</b>    | 6057.44 | -0.4287 | 0.0273  | -15.702 | 1.46E-55  | 3.79E-55  |
| <b>EFS</b>     | 1994.72 | -1.8672 | 0.0705  | -26.485 | 1.42E-154 | 8.63E-154 |
| <b>EMX2</b>    | 1161.03 | -1.1471 | 0.12748 | -8.998  | 2.30E-19  | 3.75E-19  |
| <b>ENO1</b>    | 57304.3 | -0.3479 | 0.04262 | -8.1623 | 3.29E-16  | 5.08E-16  |
| <b>EPHA2</b>   | 2478.12 | 2.20884 | 0.05574 | 39.6304 | 0         | 0         |
| <b>ERO1L</b>   | 3225.93 | -0.3541 | 0.04669 | -7.5841 | 3.35E-14  | 5.00E-14  |
| <b>ERRFI1</b>  | 7027.42 | 0.95015 | 0.06015 | 15.7957 | 3.33E-56  | 8.70E-56  |
| <b>F2RL2</b>   | 946.889 | -4.1363 | 0.09586 | -43.152 | 0         | 0         |
| <b>FAM115C</b> | 640.22  | -1.7596 | 0.05678 | -30.989 | 7.61E-211 | 6.82E-210 |
| <b>FAM126A</b> | 1043.82 | -0.6537 | 0.05516 | -11.849 | 2.17E-32  | 4.30E-32  |
| <b>FAM49A</b>  | 457.997 | 2.93101 | 0.05577 | 52.5511 | 0         | 0         |
| <b>FOXE1</b>   | 2538.15 | 11.0891 | 0.20785 | 53.3515 | 0         | 0         |
| <b>FUT4</b>    | 749.106 | -0.3538 | 0.04268 | -8.2898 | 1.13E-16  | 1.77E-16  |
| <b>FYN</b>     | 3259.73 | 2.47148 | 0.05261 | 46.9818 | 0         | 0         |
| <b>FZD5</b>    | 1539.99 | 2.10413 | 0.05529 | 38.0591 | 0         | 0         |
| <b>GALNT12</b> | 1395.26 | 3.90386 | 0.07389 | 52.8336 | 0         | 0         |
| <b>GAS2L1</b>  | 1933.06 | -0.8869 | 0.03449 | -25.712 | 8.53E-146 | 4.82E-145 |
| <b>GGCX</b>    | 2233.96 | -0.2142 | 0.03163 | -6.77   | 1.29E-11  | 1.83E-11  |
| <b>GJD3</b>    | 218.919 | 0.76789 | 0.06063 | 12.665  | 9.24E-37  | 1.93E-36  |
| <b>GMDS</b>    | 1379.91 | -1.0039 | 0.04837 | -20.755 | 1.11E-95  | 4.22E-95  |
| <b>GPR35</b>   | 419.506 | -0.7246 | 0.06243 | -11.608 | 3.77E-31  | 7.36E-31  |
| <b>GREM1</b>   | 2587.79 | -2.7903 | 0.10787 | -25.868 | 1.52E-147 | 8.73E-147 |
| <b>GTF3C3</b>  | 1987.34 | -0.3592 | 0.02385 | -15.062 | 2.89E-51  | 7.13E-51  |
| <b>GULP1</b>   | 640.82  | 0.34179 | 0.07153 | 4.77814 | 1.77E-06  | 2.25E-06  |
| <b>HMG20B</b>  | 5489.95 | -0.8186 | 0.02685 | -30.484 | 4.31E-204 | 3.71E-203 |
| <b>HMGB3</b>   | 5577.2  | -1.6441 | 0.06003 | -27.388 | 3.86E-165 | 2.52E-164 |
| <b>HNF1A</b>   | 245.61  | -1.1339 | 0.07841 | -14.461 | 2.14E-47  | 5.07E-47  |
| <b>HNF4G</b>   | 277.795 | -6.2544 | 0.13349 | -46.852 | 0         | 0         |
| <b>HOXA13</b>  | 77.3845 | -2.3855 | 0.20455 | -11.662 | 1.99E-31  | 3.89E-31  |
| <b>HOXC8</b>   | 167.777 | -5.4351 | 0.0949  | -57.275 | 0         | 0         |
| <b>HOXC9</b>   | 218.878 | -5.1496 | 0.09837 | -52.347 | 0         | 0         |
| <b>IER5L</b>   | 2059.74 | 0.28554 | 0.05433 | 5.25538 | 1.48E-07  | 1.93E-07  |
| <b>IGF2BP1</b> | 142.698 | -2.2957 | 0.18221 | -12.6   | 2.12E-36  | 4.41E-36  |
| <b>IL22RA1</b> | 266.713 | 2.25289 | 0.09592 | 23.4876 | 5.46E-122 | 2.56E-121 |
| <b>IPPK</b>    | 1053.05 | -1.0976 | 0.03032 | -36.207 | 4.81E-287 | 6.90E-286 |
| <b>IQCA1</b>   | 828.264 | 3.48015 | 0.08491 | 40.9859 | 0         | 0         |
| <b>IRAK3</b>   | 760.228 | -0.8446 | 0.07413 | -11.394 | 4.46E-30  | 8.57E-30  |
| <b>IRX5</b>    | 1464.78 | -7.411  | 0.08945 | -82.853 | 0         | 0         |

|           |         |         |         |         |             |             |
|-----------|---------|---------|---------|---------|-------------|-------------|
| ISCU      | 5100.68 | 1.90679 | 0.02875 | 66.3119 | 0           | 0           |
| ITGB3     | 1998.06 | 4.17437 | 0.08147 | 51.2376 | 0           | 0           |
| KCNJ15    | 2194.64 | 6.55889 | 0.08335 | 78.6886 | 0           | 0           |
| KLF3      | 4155.05 | 0.39248 | 0.02462 | 15.9413 | 3.27E-57    | 8.63E-57    |
| KLHL14    | 1062.48 | 5.21229 | 0.10642 | 48.9801 | 0           | 0           |
| LILRB3    | 177.152 | -0.478  | 0.06915 | -6.9133 | 4.74E-12    | 6.78E-12    |
| LMO7      | 6171.05 | 2.30817 | 0.04991 | 46.2485 | 0           | 0           |
| LOC84740  | 930.367 | -4.7457 | 0.15509 | -30.6   | 1.21E-205   | 1.05E-204   |
| LPCAT1    | 8849.05 | -1.1973 | 0.04956 | -24.157 | 6.28E-129   | 3.14E-128   |
| MAFK      | 2562.79 | 0.24663 | 0.03922 | 6.28828 | 3.21E-10    | 4.44E-10    |
| MAPKAPK3  | 3705.76 | 1.74455 | 0.03236 | 53.9119 | 0           | 0           |
| MEIS1     | 2136.62 | -1.7935 | 0.05538 | -32.387 | 4.14E-230   | 4.25E-229   |
| MUC4      | 1639.02 | -0.5678 | 0.15128 | -3.7534 | 0.000174446 | 0.000210365 |
| NBPF10    | 2075.07 | -1.1899 | 0.05655 | -21.041 | 2.74E-98    | 1.07E-97    |
| NIN       | 2548.78 | -0.8453 | 0.03187 | -26.528 | 4.66E-155   | 2.83E-154   |
| NUDT16P1  | 458.128 | 1.45315 | 0.06586 | 22.0633 | 7.11E-108   | 3.02E-107   |
| NYNRIN    | 2599.49 | 1.2127  | 0.05817 | 20.8465 | 1.64E-96    | 6.29E-96    |
| OGFRL1    | 1005.35 | -1.5405 | 0.05503 | -27.992 | 2.02E-172   | 1.39E-171   |
| OSBPL3    | 1900.07 | 1.40025 | 0.0519  | 26.9776 | 2.70E-160   | 1.71E-159   |
| PABPC3    | 1407.18 | -0.9747 | 0.04857 | -20.067 | 1.43E-89    | 5.15E-89    |
| PADI2     | 2795.44 | -4.4786 | 0.09602 | -46.642 | 0           | 0           |
| PAPLN     | 1439.99 | 2.47032 | 0.0647  | 38.1831 | 0           | 0           |
| PCDP1     | 155.199 | 1.20581 | 0.13261 | 9.093   | 9.63E-20    | 1.58E-19    |
| PIK3R1    | 5504.79 | -0.687  | 0.05038 | -13.637 | 2.43E-42    | 5.44E-42    |
| PITPNM1   | 3075.04 | 1.17408 | 0.04443 | 26.4284 | 6.46E-154   | 3.89E-153   |
| PNRC1     | 6180.57 | 0.64155 | 0.03687 | 17.4    | 8.25E-68    | 2.43E-67    |
| POF1B     | 1116.43 | -3.0652 | 0.12466 | -24.588 | 1.70E-133   | 8.85E-133   |
| POSTN     | 36945.3 | -3.1331 | 0.09535 | -32.86  | 8.24E-237   | 8.75E-236   |
| PPP2R4    | 10291.5 | -0.539  | 0.02472 | -21.806 | 2.03E-105   | 8.42E-105   |
| PPP4R1    | 4565.9  | 0.19383 | 0.0274  | 7.07291 | 1.52E-12    | 2.19E-12    |
| PRIMA1    | 426.151 | -1.4497 | 0.10554 | -13.737 | 6.11E-43    | 1.38E-42    |
| PROX1     | 94.9841 | 1.67423 | 0.10665 | 15.6988 | 1.54E-55    | 3.99E-55    |
| PRR7      | 356.667 | -0.7432 | 0.06295 | -11.807 | 3.59E-32    | 7.08E-32    |
| PRSS3     | 347.489 | 1.20214 | 0.168   | 7.15547 | 8.34E-13    | 1.21E-12    |
| PSME4     | 5848.39 | -0.896  | 0.03328 | -26.926 | 1.08E-159   | 6.81E-159   |
| PTGS1     | 3620.61 | -1.3029 | 0.05834 | -22.333 | 1.77E-110   | 7.69E-110   |
| RAB11FIP5 | 2452.82 | -0.6883 | 0.03307 | -20.812 | 3.35E-96    | 1.28E-95    |
| RAB3IP    | 1843.85 | -0.4525 | 0.04814 | -9.399  | 5.51E-21    | 9.25E-21    |
| RBM14     | 3005.43 | -0.1571 | 0.01623 | -9.6794 | 3.69E-22    | 6.32E-22    |
| RBMXL1    | 1757.42 | -0.1196 | 0.02259 | -5.2947 | 1.19E-07    | 1.56E-07    |
| REP15     | 67.4638 | 0.57378 | 0.06699 | 8.56567 | 1.07E-17    | 1.71E-17    |
| RHOF      | 1401.89 | 1.75816 | 0.07418 | 23.7008 | 3.54E-124   | 1.69E-123   |

|                       |         |         |         |         |             |             |
|-----------------------|---------|---------|---------|---------|-------------|-------------|
| <b>RHOU</b>           | 3104.79 | 2.1605  | 0.06005 | 35.9766 | 1.94E-283   | 2.71E-282   |
| <b>ROS1</b>           | 587.327 | -1.0717 | 0.22531 | -4.7565 | 1.97E-06    | 2.51E-06    |
| <b>RTN4RL1</b>        | 820.116 | -4.1761 | 0.09025 | -46.273 | 0           | 0           |
| <b>SEL1L3</b>         | 5779.97 | 2.04867 | 0.06482 | 31.6048 | 3.17E-219   | 3.04E-218   |
| <b>SFTA2</b>          | 860.678 | 4.31509 | 0.18356 | 23.5073 | 3.43E-122   | 1.61E-121   |
| <b>SFTPA2</b>         | 26597.7 | 4.01867 | 0.15964 | 25.1727 | 7.98E-140   | 4.34E-139   |
| <b>SFTPB</b>          | 58184.4 | 10.7305 | 0.18489 | 58.0387 | 0           | 0           |
| <b>SGPP2</b>          | 505.305 | 1.69707 | 0.0884  | 19.198  | 3.85E-82    | 1.29E-81    |
| <b>SH3TC2</b>         | 137.14  | -0.3047 | 0.08531 | -3.5711 | 0.000355476 | 0.000424991 |
| <b>SHOX2</b>          | 137.388 | -2.6585 | 0.08671 | -30.659 | 2.01E-206   | 1.75E-205   |
| <b>SLC16A3</b>        | 4475.32 | 0.2324  | 0.06165 | 3.76938 | 0.000163654 | 0.000197543 |
| <b>SLC5A6</b>         | 3718.44 | -3.0248 | 0.0499  | -60.621 | 0           | 0           |
| <b>SNRPN</b>          | 7199.12 | 2.20516 | 0.05457 | 40.4128 | 0           | 0           |
| <b>SNTB1</b>          | 2940.19 | 2.87747 | 0.0581  | 49.5222 | 0           | 0           |
| <b>SOX17</b>          | 1447.5  | 0.32306 | 0.05814 | 5.55664 | 2.75E-08    | 3.64E-08    |
| <b>SOX2</b>           | 328.115 | -5.2739 | 0.18675 | -28.241 | 1.86E-175   | 1.31E-174   |
| <b>SPRR3</b>          | 50.4587 | -3.0802 | 0.2934  | -10.498 | 8.83E-26    | 1.59E-25    |
| <b>SRL</b>            | 342.905 | 5.44947 | 0.07675 | 71.0073 | 0           | 0           |
| <b>STAMBPL1</b>       | 350.138 | -0.6987 | 0.05128 | -13.624 | 2.87E-42    | 6.43E-42    |
| <b>STARD3NL</b>       | 1970.17 | 0.60911 | 0.02799 | 21.7602 | 5.53E-105   | 2.29E-104   |
| <b>STK17A</b>         | 1733.47 | -0.4008 | 0.041   | -9.7763 | 1.42E-22    | 2.46E-22    |
| <b>STK33</b>          | 306.893 | 4.99973 | 0.10542 | 47.4282 | 0           | 0           |
| <b>TBX4</b>           | 73.5169 | -3.1685 | 0.15579 | -20.339 | 5.82E-92    | 2.13E-91    |
| <b>TBX5</b>           | 141.449 | -2.4714 | 0.10744 | -23.003 | 4.34E-117   | 1.97E-116   |
| <b>TFAP2A</b>         | 3570.45 | -7.265  | 0.07658 | -94.868 | 0           | 0           |
| <b>TFPI</b>           | 2180.11 | -0.8757 | 0.07368 | -11.886 | 1.41E-32    | 2.79E-32    |
| <b>TG</b>             | 122733  | 14.6101 | 0.09508 | 153.656 | 0           | 0           |
| <b>TMEM125</b>        | 1976.24 | 0.60393 | 0.0452  | 13.3617 | 1.01E-40    | 2.23E-40    |
| <b>TMEM189.UBE2V1</b> | 106.474 | -0.9133 | 0.18485 | -4.9407 | 7.78E-07    | 1.00E-06    |
| <b>TMPRSS4</b>        | 3172.42 | 3.24068 | 0.13923 | 23.2751 | 7.92E-120   | 3.68E-119   |
| <b>TMUB1</b>          | 2457.84 | 0.38033 | 0.02643 | 14.3878 | 6.17E-47    | 1.45E-46    |
| <b>TNFSF10</b>        | 8460.82 | -2.8268 | 0.07024 | -40.246 | 0           | 0           |
| <b>TP53I3</b>         | 1034.62 | 0.86222 | 0.04468 | 19.2996 | 5.41E-83    | 1.83E-82    |
| <b>TRPS1</b>          | 14055.4 | -4.6335 | 0.05918 | -78.295 | 0           | 0           |
| <b>TSHR</b>           | 5366.57 | 10.606  | 0.10119 | 104.809 | 0           | 0           |
| <b>TSHZ2</b>          | 342.181 | -1.2576 | 0.07492 | -16.785 | 3.12E-63    | 8.76E-63    |
| <b>TSPAN3</b>         | 15911.8 | 1.43967 | 0.03965 | 36.3094 | 1.15E-288   | 1.67E-287   |
| <b>TXNRD1</b>         | 6856.62 | -0.6134 | 0.04865 | -12.61  | 1.87E-36    | 3.89E-36    |
| <b>UAP1</b>           | 4251.85 | -1.5417 | 0.03362 | -45.86  | 0           | 0           |
| <b>UBAP1</b>          | 3893.18 | -0.0895 | 0.02371 | -3.7774 | 0.000158448 | 0.000191353 |
| <b>VANGL1</b>         | 2792.57 | -1.1929 | 0.03663 | -32.563 | 1.37E-232   | 1.43E-231   |
| <b>VSTM2L</b>         | 1170.07 | 1.22453 | 0.11733 | 10.4363 | 1.69E-25    | 3.04E-25    |

|                |         |         |         |         |           |           |
|----------------|---------|---------|---------|---------|-----------|-----------|
| <b>WT1</b>     | 1797.4  | -4.7802 | 0.1424  | -33.569 | 4.83E-247 | 5.48E-246 |
| <b>XAGE1D</b>  | 1129.49 | -4.7626 | 0.30729 | -15.499 | 3.53E-54  | 9.00E-54  |
| <b>ZDHHC7</b>  | 3272.22 | -0.1507 | 0.02559 | -5.8885 | 3.90E-09  | 5.27E-09  |
| <b>ZNF280B</b> | 198.397 | 2.01472 | 0.0844  | 23.8724 | 5.93E-126 | 2.89E-125 |
| <b>ZNF628</b>  | 562.854 | 0.27863 | 0.0287  | 9.70931 | 2.75E-22  | 4.73E-22  |
| <b>ZNF771</b>  | 256.77  | -0.2152 | 0.04531 | -4.7499 | 2.04E-06  | 2.59E-06  |
| <b>ZNF90</b>   | 1110.07 | 1.3678  | 0.06389 | 21.4085 | 1.11E-101 | 4.47E-101 |
