# Supplementary material for: A stacking ensemble deep learning approach to cancer type classification based on TCGA data
Source: Springer Nature journal article supplement (doi:10.1038/s41598-021-95128-x), 2021-08-02
Supplement: MOESM2 [file 41598_2021_95128_MOESM2_ESM.pdf]

# A Stacking Ensemble Deep Learning Approach to Cancer Type Classification Based on TCGA Data

Mohanad Mohammed<sup>1\*</sup>, Henry Mwambi<sup>1</sup>, Innocent B. Mboya<sup>1,4</sup>, Murtada K. Elbashir<sup>5,6</sup>, Bernard Omolo<sup>1,2,3</sup>

<sup>1</sup>School of Mathematics, Statistics and Computer Science, University of KwaZulu-Natal, Pietermaritzburg, Private Bag X01, Scottsville 3209, South Africa.

<sup>2</sup>Division of Mathematics & Computer Science, University of South Carolina-Upstate, 800 University Way, Spartanburg, USA.

<sup>3</sup>School of Public Health, Faculty of Health Sciences, University of Witwatersrand, Johannesburg, South Africa.

<sup>4</sup>Department of Epidemiology and Biostatistics, Kilimanjaro Christian Medical University College (KCMUCo), P. O. Box 2240, Moshi-Tanzania.

<sup>5</sup>College of Computer and Information Sciences, Jouf University, Sakaka 72441, Saudi Arabia.

<sup>6</sup>Faculty of Mathematical and Computer Sciences, University of Gezira, Wad Madani 11123, Sudan.

\* Corresponding Author, mohanadadam32@gmail.com

## Results

### The overall predictive performance of the machine learning methods based on the oversampling

**Table 1.** The overall predictive performance of the machine learning methods based on the oversampling

| Methods        | Performance Measures |                   |          |           |             |      |
|----------------|----------------------|-------------------|----------|-----------|-------------|------|
|                | ACC (95% CI)         | Kappa (95% CI)    | F1-Score | Precision | Sensitivity | AUC  |
| <b>SVM-R</b>   | 93.1 (90.8, 94.9)    | 89.6 (86.8, 92.5) | 97.6     | 99.4      | 95.9        | 97.2 |
| <b>SVM-L</b>   | 82.4 (79.3, 85.3)    | 71.9 (67.5, 76.3) | 88.1     | 100.0     | 78.7        | 92.0 |
| <b>SVM-P</b>   | 84.0 (80.9, 86.7)    | 75.8 (71.9, 79.6) | 94.7     | 100.0     | 89.9        | 90.9 |
| <b>ANN</b>     | 86.3 (83.4, 88.8)    | 80.4 (76.8, 84.1) | 92.1     | 86.9      | 97.9        | 89.7 |
| <b>kNN</b>     | 92.0 (89.6, 94.0)    | 88.4 (85.4, 91.3) | 96.0     | 93.6      | 98.4        | 96.3 |
| <b>Bagging</b> | 98.0 (96.6, 98.9)    | 97.0 (95.4, 98.6) | 98.1     | 100       | 96.2        | 99.4 |

**Note:** SVM-R, Support Vector Machine with Radial-basis function (RBF) kernel; SVM-L, Support Vector Machine with Linear Kernel; SVM-P, Support Vector Machine with Polynomial Kernel; ANN, Artificial Neural Networks; kNN, K-nearest Neighbors; ACC, Accuracy; CI, Confidence Interval; Kappa, Kappa Statistics; AUC, Area Under the Curve.

## Predictive performance of the machine learning methods per cancer type based on the oversampling

**Table 2.** Predictive performance of the machine learning methods per-class statistics based on the oversampling

| Performance Measures | Methods |       |       |       |      |       |         |
|----------------------|---------|-------|-------|-------|------|-------|---------|
|                      | Class   | SVM-R | SVM-L | SVM-P | ANN  | kNN   | Bagging |
| Accuracy             | BRCA    | 97.5  | 86.1  | 94.2  | 92.5 | 96.0  | 98.0    |
|                      | COAD    | 93.1  | 97.5  | 94.9  | 90.9 | 93.7  | 95.8    |
|                      | LUAD    | 97.9  | 82.2  | 89.8  | 80.1 | 86.0  | 97.1    |
|                      | OV      | 82.7  | 52.3  | 50.6  | 93.2 | 98.0  | 97.1    |
|                      | THCA    | 96.0  | 99.6  | 99.6  | 98.9 | 99.1  | 100.0   |
| Sensitivity          | BRCA    | 99.4  | 100.0 | 100.0 | 86.9 | 93.6  | 100.0   |
|                      | COAD    | 86.1  | 97.2  | 100.0 | 88.9 | 94.4  | 91.7    |
|                      | LUAD    | 100.0 | 66.3  | 80.2  | 61.6 | 72.1  | 94.2    |
|                      | OV      | 66.7  | 4.6   | 01.1  | 90.8 | 96.6  | 94.3    |
|                      | THCA    | 91.9  | 99.1  | 99.1  | 99.1 | 98.2  | 100.0   |
| Specificity          | BRCA    | 95.6  | 72.2  | 88.4  | 98.1 | 98.4  | 95.9    |
|                      | COAD    | 100.0 | 97.7  | 89.7  | 93.0 | 93.0  | 100.0   |
|                      | LUAD    | 95.7  | 98.0  | 99.3  | 98.6 | 99.8  | 100.0   |
|                      | OV      | 98.8  | 100.8 | 100.0 | 95.6 | 99.5  | 100.0   |
|                      | THCA    | 100.0 | 100.0 | 100.0 | 98.7 | 100.0 | 100.0   |
| F1-Score             | BRCA    | 97.6  | 88.1  | 94.7  | 92.1 | 96.0  | 98.1    |
|                      | COAD    | 92.5  | 82.4  | 53.3  | 57.7 | 60.2  | 95.7    |
|                      | LUAD    | 87.8  | 74.0  | 86.8  | 72.1 | 83.2  | 97.0    |
|                      | OV      | 76.3  | 08.8  | 02.3  | 82.7 | 96.6  | 97.0    |
|                      | THCA    | 95.8  | 99.6  | 99.6  | 96.5 | 99.1  | 100.0   |
| Precision            | BRCA    | 95.9  | 78.7  | 89.9  | 98.0 | 98.4  | 96.2    |
|                      | COAD    | 100.0 | 71.4  | 36.4  | 42.7 | 44.2  | 100.0   |
|                      | LUAD    | 78.2  | 83.8  | 94.5  | 86.9 | 98.4  | 100.0   |
|                      | OV      | 89.2  | 100.1 | 100.0 | 76.0 | 96.6  | 100.0   |
|                      | THCA    | 100.0 | 100.0 | 100.0 | 94.0 | 100.0 | 100.0   |

**Note:** SVM-R, Support Vector Machine with Radial-basis function (RBF) kernel; SVM-L, Support Vector Machine with Linear Kernel; SVM-P, Support Vector Machine with Polynomial Kernel; ANN, Artificial Neural Networks; kNN, K-nearest Neighbors.

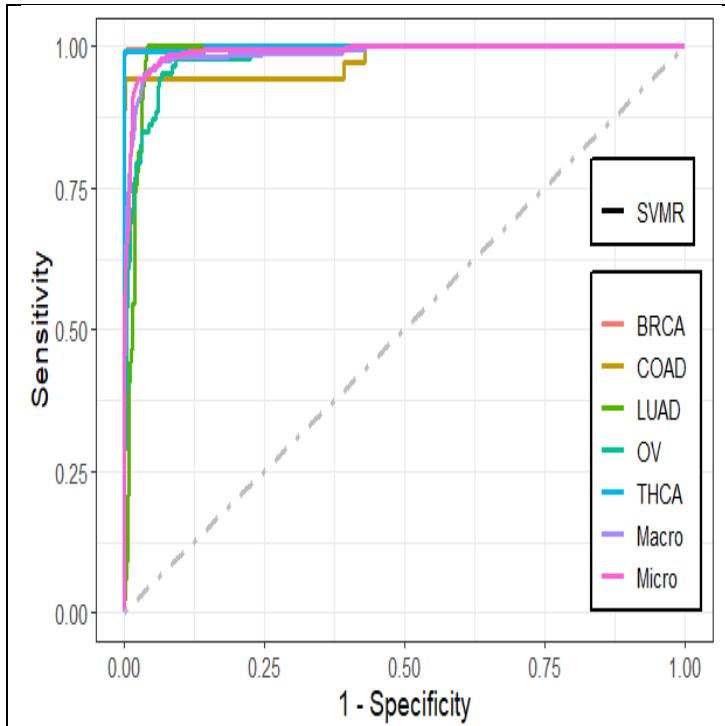

**Figure 1.** Multi-class ROC curves visualization for the SVMR model based on over sampling technique.

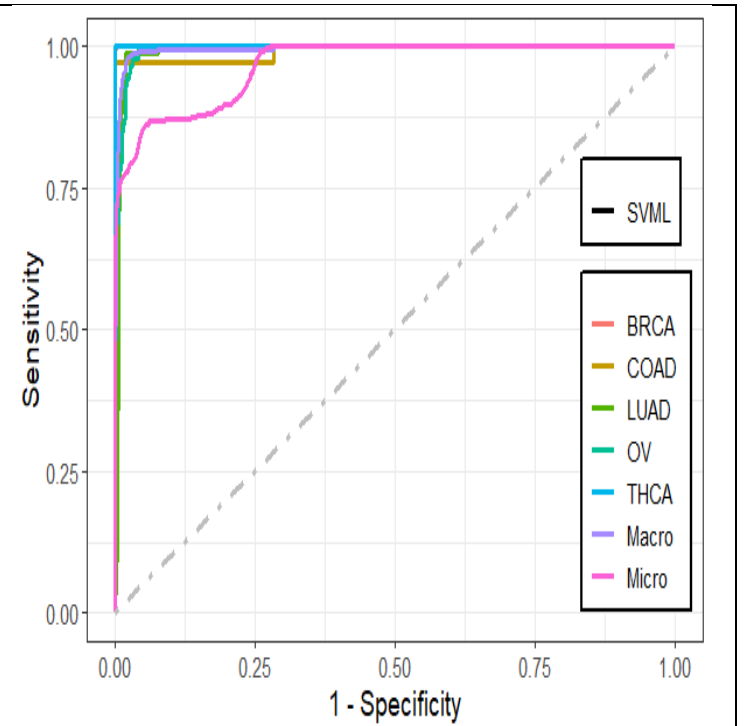

**Figure 2.** Multi-class ROC curves visualization for the SVML model based on over sampling technique.

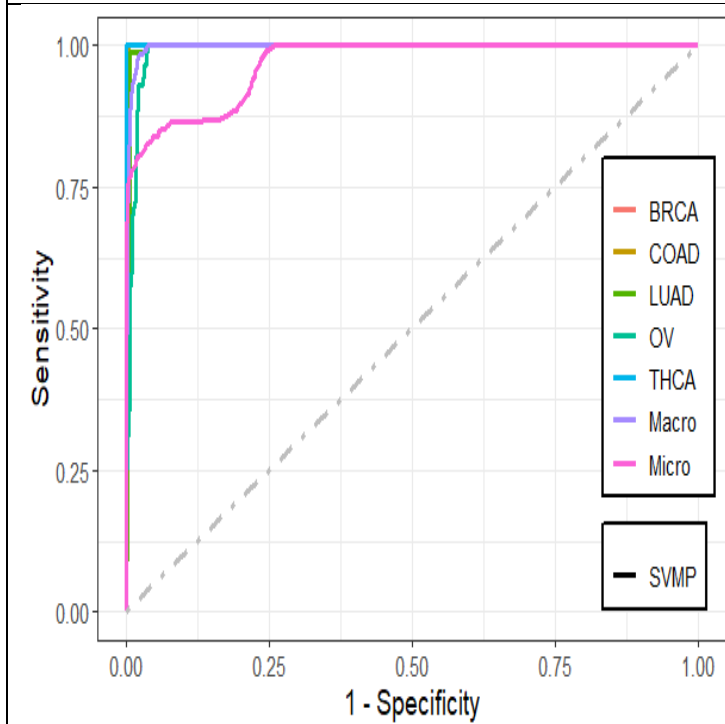

**Figure 3.** Multi-class ROC curves visualization for the SVMP model based on over sampling technique.

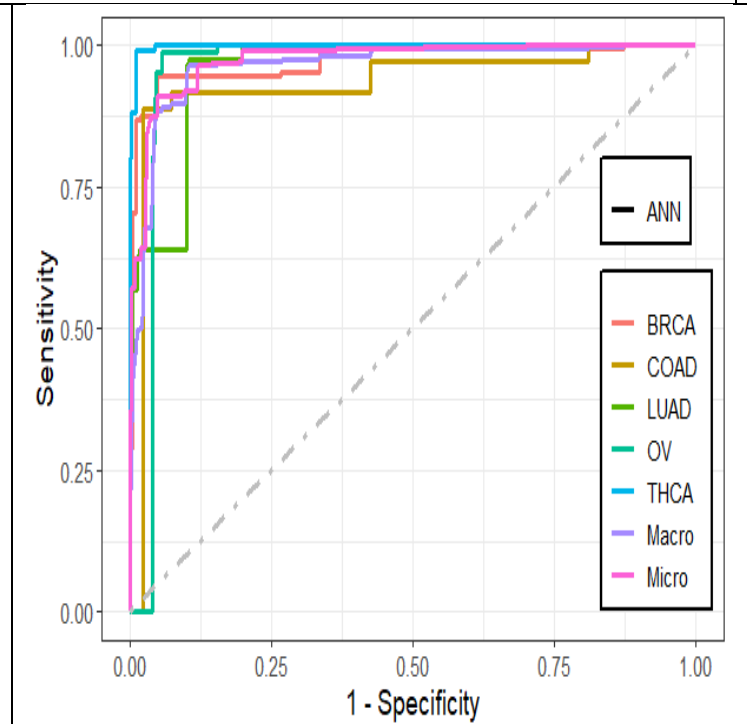

**Figure 4.** Multi-class ROC curves visualization for the ANN model based on over sampling technique.

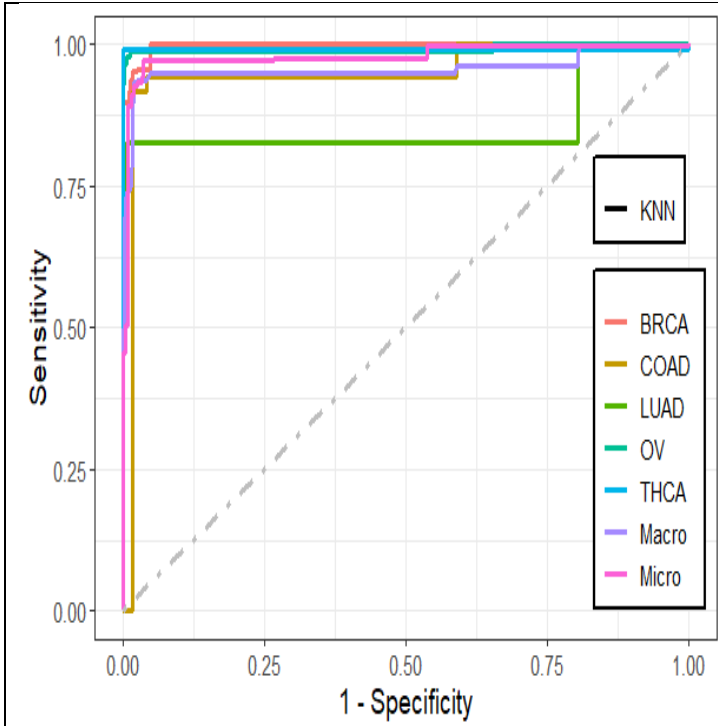

**Figure 5.** Multi-class ROC curves visualization for the kNN model based on over sampling technique.

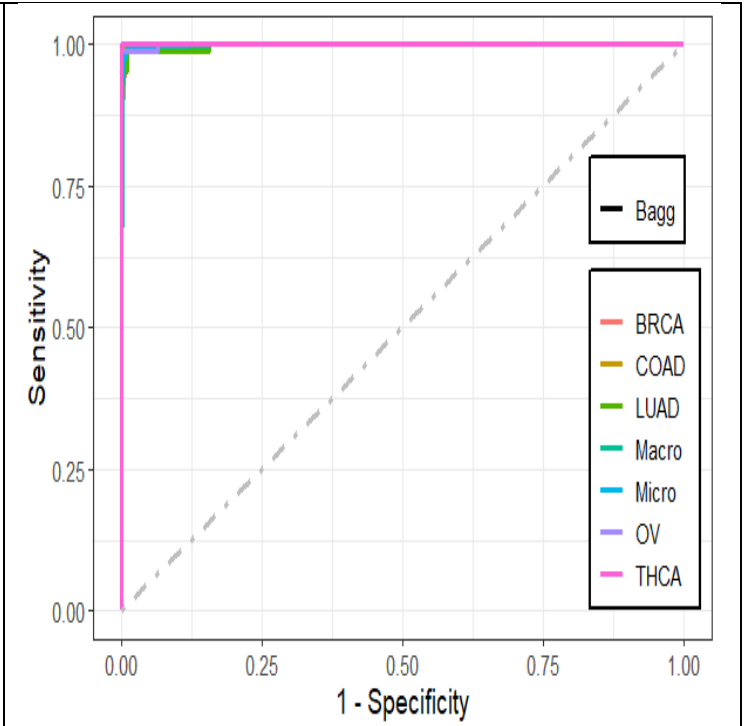

**Figure 6.** Multi-class ROC curves visualization for the bagging model based on over sampling technique.

## Statistical Significance Test

Table 3. Pairwise statistical analysis test p-values and the estimated differences for the models (over sampling technique)

| Accuracy |       |        |        |        |        |         |
|----------|-------|--------|--------|--------|--------|---------|
|          | SVMR  | SVML   | SVMP   | ANN    | KNN    | Bagging |
| SVMR     |       | 0.120  | 0.109  | 0.090  | -0.008 | -0.054  |
| SVML     | 0.001 |        | -0.011 | -0.030 | -0.128 | -0.174  |
| SVMP     | 0.001 | 1.00   |        | -0.019 | -0.117 | -0.163  |
| ANN      | 0.002 | 1.00   | 1.00   |        | -0.098 | -0.144  |
| KNN      | 1.00  | <0.001 | <0.001 | 0.004  |        | -0.045  |
| Bagging  | 0.077 | <0.001 | <0.001 | <0.001 | <0.001 |         |

  

| Kappa   |        |        |        |        |        |         |
|---------|--------|--------|--------|--------|--------|---------|
|         | SVMR   | SVML   | SVMP   | ANN    | KNN    | Bagging |
| SVMR    |        | 0.193  | 0.162  | 0.135  | -0.013 | -0.079  |
| SVML    | <0.001 |        | -0.030 | -0.057 | -0.206 | -0.272  |
| SVMP    | <0.001 | 1.00   |        | -0.027 | -0.175 | -0.241  |
| ANN     | 0.002  | 1.00   | 1.00   |        | -0.148 | -0.214  |
| KNN     | 1.00   | <0.001 | <0.001 | 0.004  |        | -0.066  |
| Bagging | 0.076  | <0.001 | <0.001 | <0.001 | <0.001 |         |

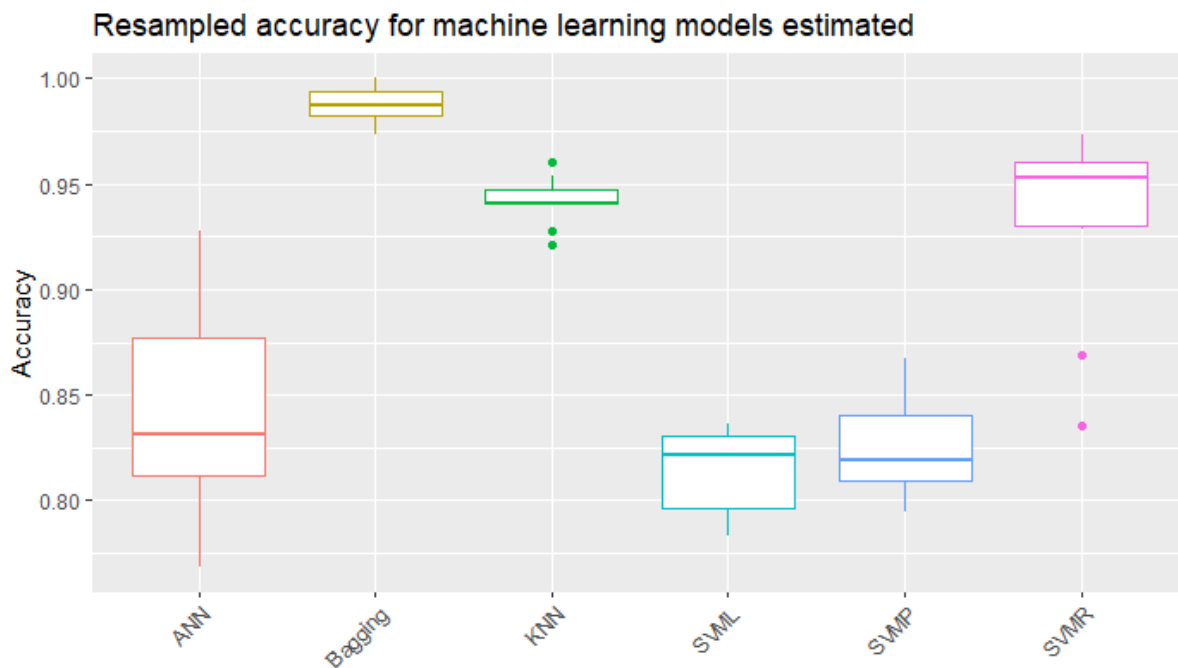

Figure 20. Compares both the mean estimated accuracy and kappa statistic as well as the 95% confidence interval for the methods based on the over sampling technique.

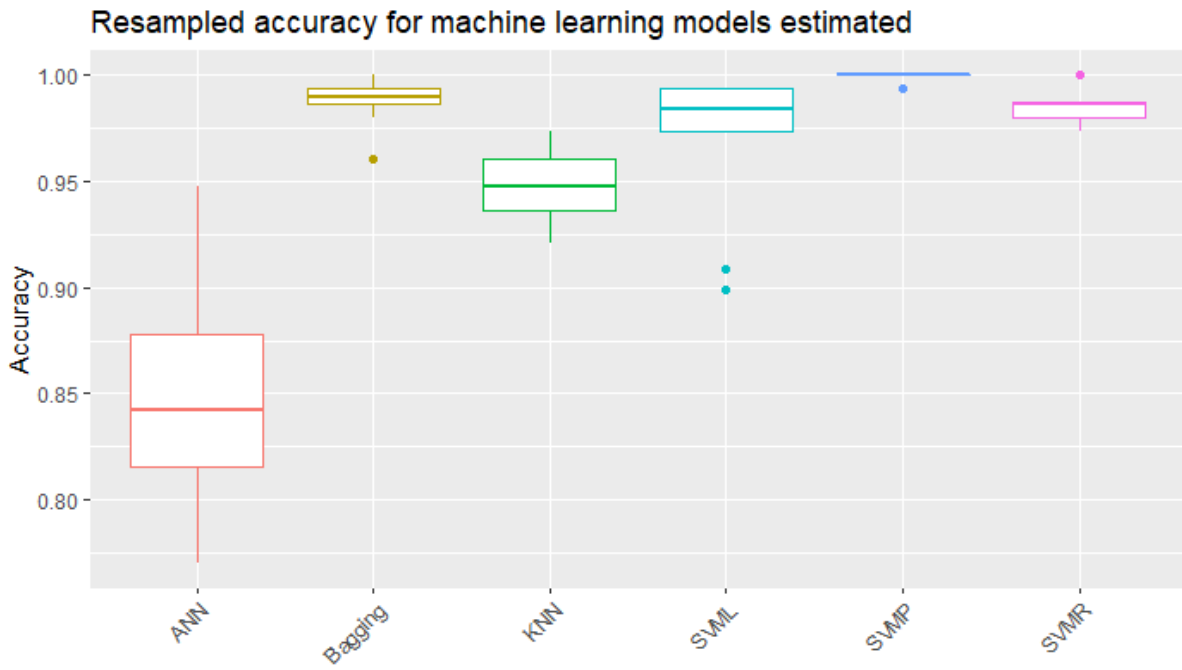

**Figure 21.** Compares both the mean estimated accuracy and kappa statistic as well as the 95% confidence interval for the methods based on the under sampling technique.
